# Supplementary material
Source: publisher figshare collection journal article supplement (https://acs.figshare.com/ndownloader/files/28762107)
Supplement: Supplementary file 1 [file 28762107]

## Supporting Information

### Design Giant Magneto Resistance Device with High Spin Filter Efficiency

*Fengxian Gao,<sup>1</sup> Lu Liu,<sup>1</sup> Ke Xu<sup>2\*</sup> and Songtao Zhao<sup>1\*</sup>*

<sup>1</sup>Key Laboratory of Optic-electric Sensing and Analytical Chemistry for Life Science, MOE, College of Chemistry and Molecular Engineering, Qingdao University of Science and Technology, Qingdao, 266042, China

<sup>2</sup>Hubei Key Laboratory of Low Dimensional Optoelectronic Materials and Devices, Hubei University of Arts and Science, Xiangyang, 441053, China

\*Corresponding Author:

[xuke@hbuas.edu.cn](mailto:xuke@hbuas.edu.cn); [stzhao@qust.edu.cn](mailto:stzhao@qust.edu.cn)

This PDF file includes:

Supplementary Figure S1

Supplementary Figure S2

Supplementary Figure S3

Supplementary Figure S4

Supplementary Figure S5

Supplementary Figure S6

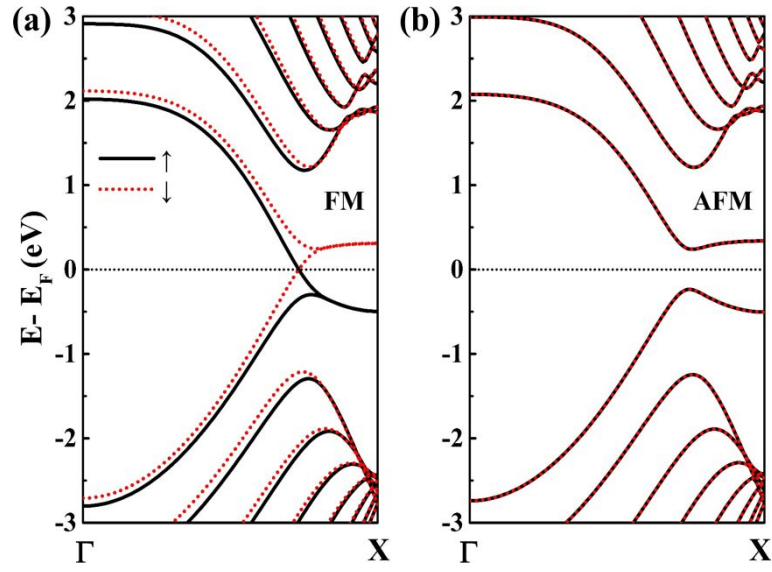

**Figure S1.** The band structures of ZGNR (a) The FM coupling (b) The AFM coupling.

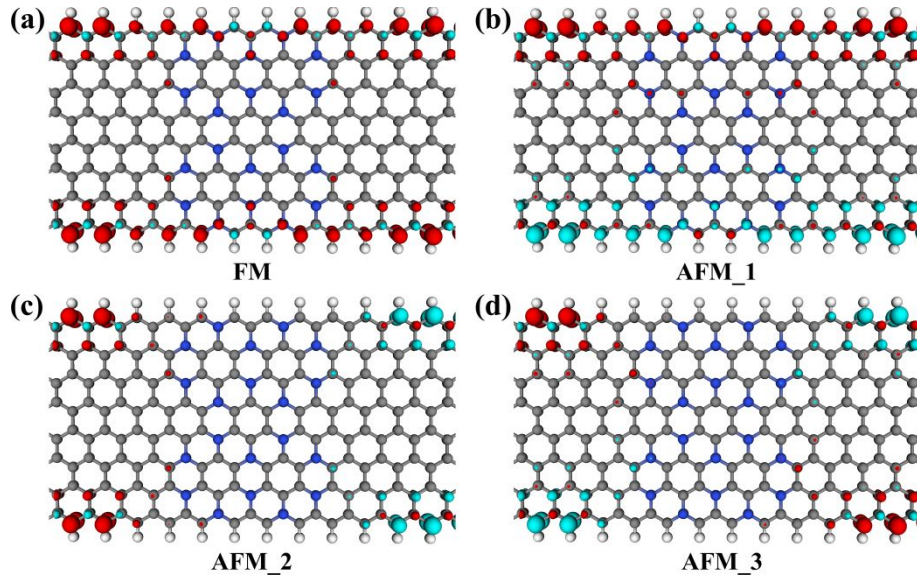

**Figure S2.** The spin density of four magnetic configurations in the  $C_3N$  junction (a) The FM coupling (b)-(d) The three AFM coupling cases.

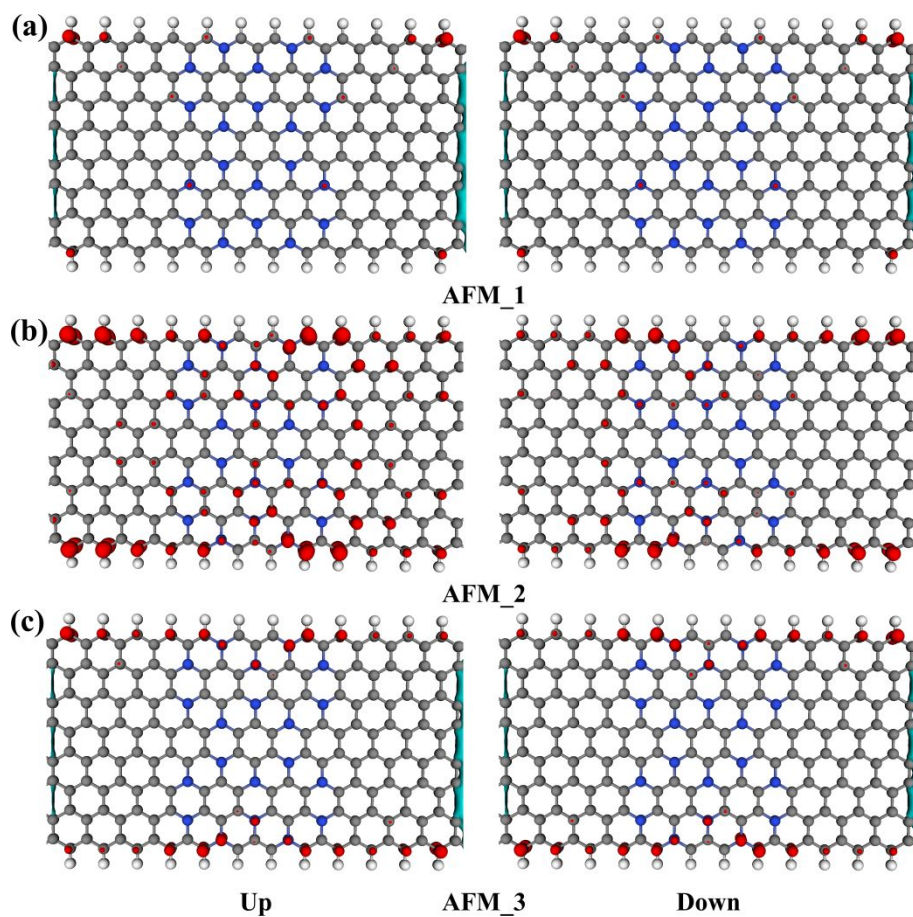

**Figure S3.** The spin-resolved LDOS in the  $C_3N$  junction at the Fermi level (a)-(c) The three AFM coupling cases.

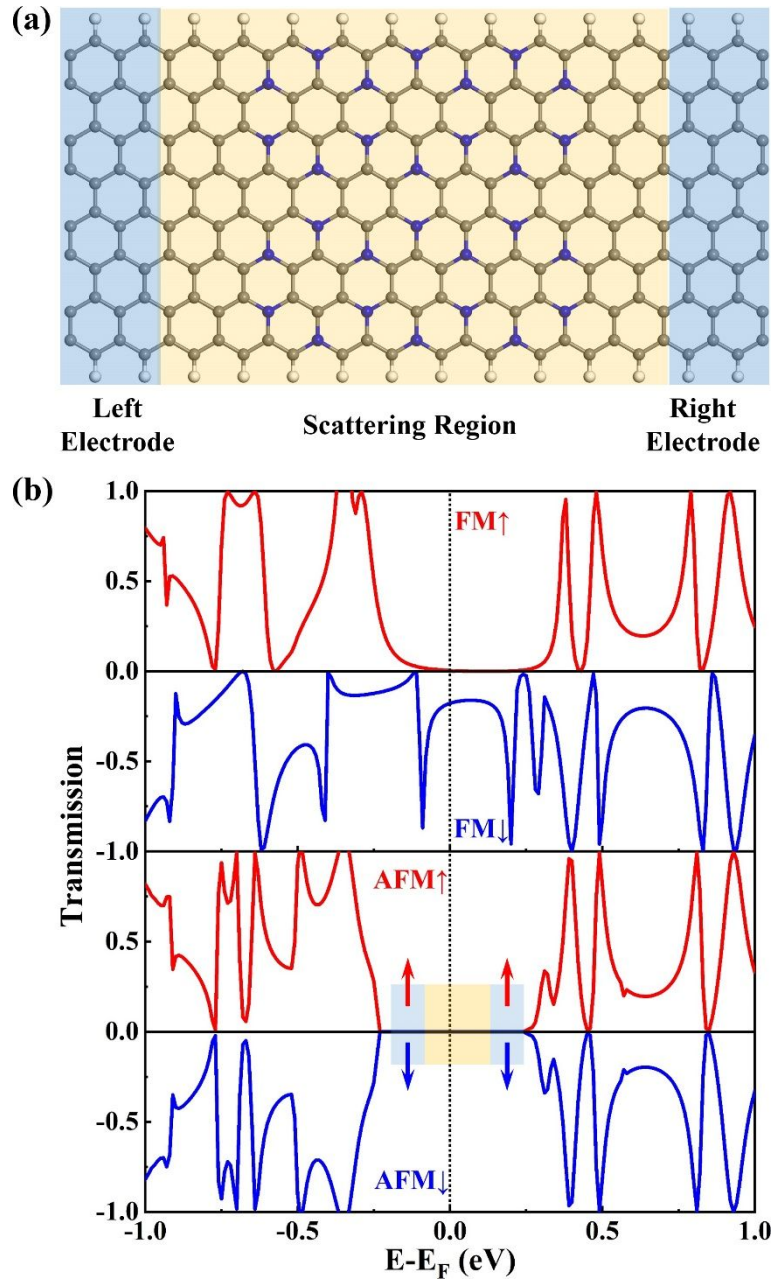

**Figure S4.** The spin-resolved transmission spectra of longer  $C_3N$  junction with ferromagnetic (FM) coupling and AFM coupling of two electrodes. The red and blue marked lines stand for the current of spin-up and spin-down electrons, respectively.

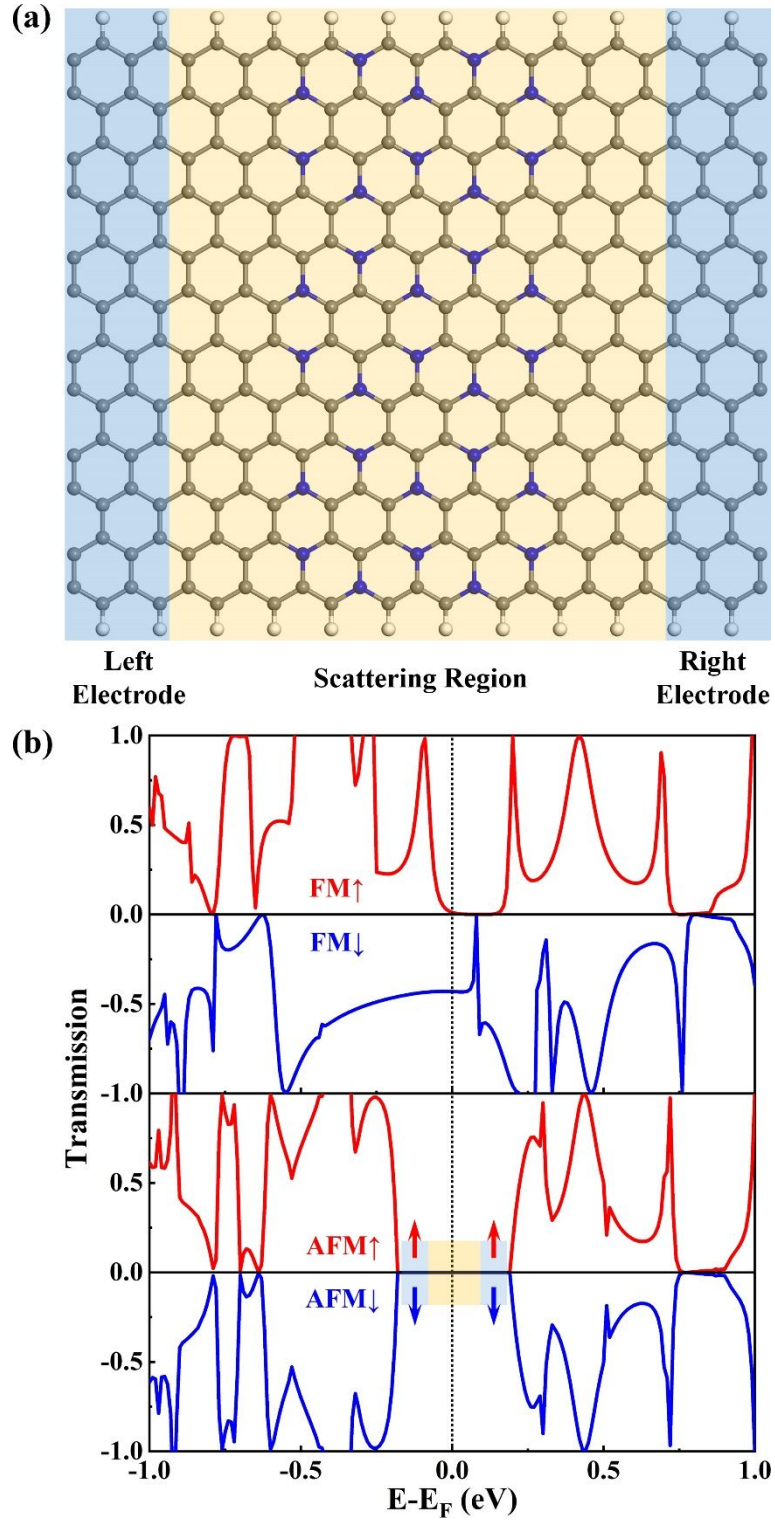

**Figure S5.** The spin-resolved transmission spectra of larger width  $C_3N$  (12-ZGNR) junction with ferromagnetic (FM) coupling and AFM coupling of two electrodes. The red and blue marked lines stand for the current of spin-up and spin-down electrons, respectively.



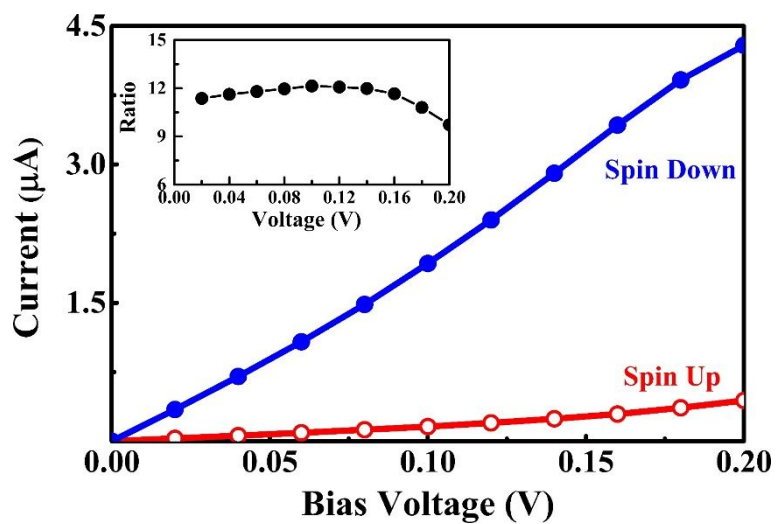

**Figure S6.** The spin-resolved I-V curves of the second type  $C_3N$  junction with ferromagnetic (FM) coupling of two electrodes. The red and blue marked lines stand for the current of spin-up and spin-down electrons, respectively. The inset denotes the rectification ratio of the two spin current under bias voltage.
